# Supplementary material for: Molecular Detection of Candida auris Using DiaSorin Molecular Simplexa® Detection Kit: A Diagnostic Performance Evaluation
Source: MDPI journal article supplement (doi:10.3390/jof9080849), 2023-08-15
Supplement: s1 [file s1]

**Table S1.** Intra-run Ct results for tested specimens

| Sample ID | <i>C. auris</i> (FAM) | SEAC (Q670) | Result       |
|-----------|-----------------------|-------------|--------------|
| CA065a    | 15                    | 33.2        | Detected     |
| CA065b    | 18.8                  | 31.3        | Detected     |
| CA065c    | 13.7                  | 33.9        | Detected     |
| CA066a    | 17.6                  | 31.1        | Detected     |
| CA066b    | 18.5                  | 30.9        | Detected     |
| CA066c    | 17.3                  | 32.2        | Detected     |
| CA082a    | 16.8                  | 32.4        | Detected     |
| CA082b    | 18.6                  | 31.5        | Detected     |
| CA082c    | 16.8                  | 32.4        | Detected     |
| CA093a    | NaN                   | 30.4        | Not Detected |
| CA093b    | NaN                   | 31          | Not Detected |
| CA093c    | NaN                   | 31.4        | Not Detected |
| CA094a    | NaN                   | 31          | Not Detected |
| CA094b    | NaN                   | 31.1        | Not Detected |
| CA094c    | NaN                   | 31.1        | Not Detected |
| CA096a    | NaN                   | 31.2        | Not Detected |
| CA096b    | NaN                   | 31          | Not Detected |
| CA096c    | NaN                   | 30.9        | Not Detected |

**Table S2.** Inter-run Ct results for tested specimens

| Run 1  | <i>C.auris</i> (FAM) | SEAC (Q670) | Run 2  | <i>C.auris</i> (FAM) | SEAC (Q670) | Run 3  | <i>C.auris</i> (FAM) | SEAC (Q670) | Result       |
|--------|----------------------|-------------|--------|----------------------|-------------|--------|----------------------|-------------|--------------|
| CA065a | 15                   | 33.2        | CA065a | 13.7                 | 35.1        | CA065a | 19.1                 | 28.1        | Detected     |
| CA066a | 17.6                 | 31.1        | CA066a | 13                   | 37.9        | CA066a | 19                   | 28.3        | Detected     |
| CA082a | 16.8                 | 32.4        | CA082a | 18.6                 | 31.4        | CA082a | 13.9                 | 30.5        | Detected     |
| CA093a | NaN                  | 30.4        | CA093a | NaN                  | 31.1        | CA093a | NaN                  | 28.2        | Not Detected |
| CA093c | NaN                  | 31.4        | CA093c | NaN                  | 31.1        | CA093c | NaN                  | 28.2        | Not Detected |
| CA094a | NaN                  | 31          | CA094a | NaN                  | 31          | CA094a | NaN                  | 28          | Not Detected |
